# Supplementary material for: Implications of the 2019–2020 megafires for the biogeography and conservation of Australian vegetation
Source: PubMed Central journal article supplement (PMC7884386; doi:10.1038/s41467-021-21266-5), 2021-02-15
Supplement: 41467_2021_21266_MOESM1_ESM.pdf [file 41467_2021_21266_MOESM1_ESM.pdf]

# **Implications of the 2019-2020 Megafires for the Biogeography and Conservation of Australian Vegetation**

## **Supplementary Information**

Supplementary Figure 1. Rainfall and temperature across Australia prior to the 2019-2020 fire season.

Supplementary Figure 2. Progression of the 2019-2020 fires in eastern Australia between 1 July 2019 and 11 February 2020.

Supplementary Figure 3. Species richness of burnt and unburnt refugial populations of range restricted and moderately widespread taxa, non-rainforest, sclerophyll forest and woodland taxa, species found in rocky habitats, and epiphytes.

Supplementary Table 1. Estimated area (ha) and percent of total (%) of broad vegetation types burnt during the 2019-2020 fires within 11 south-east Australian IBRA bioregions

Supplementary Table 2. Number of vascular plant taxa in different life forms by rainforest habitat category.

Supplementary Table 3. Counts of species endemic to the study area classified by life form and range size class.

Supplementary Notes- consisting of:

Supplementary Notes 1: Further details of range extent ( $RE_T$ ) by habitat type (rainforest) category analysis.

Supplementary Notes 2: Further details of quantile regression of proportion burnt ( $PF_M$ ) by range extent ( $RE_T$ ).

Supplementary Notes 3: Contingency analysis of life form by range extent ( $RE_T$ )

Supplementary Notes 4: List of R packages used

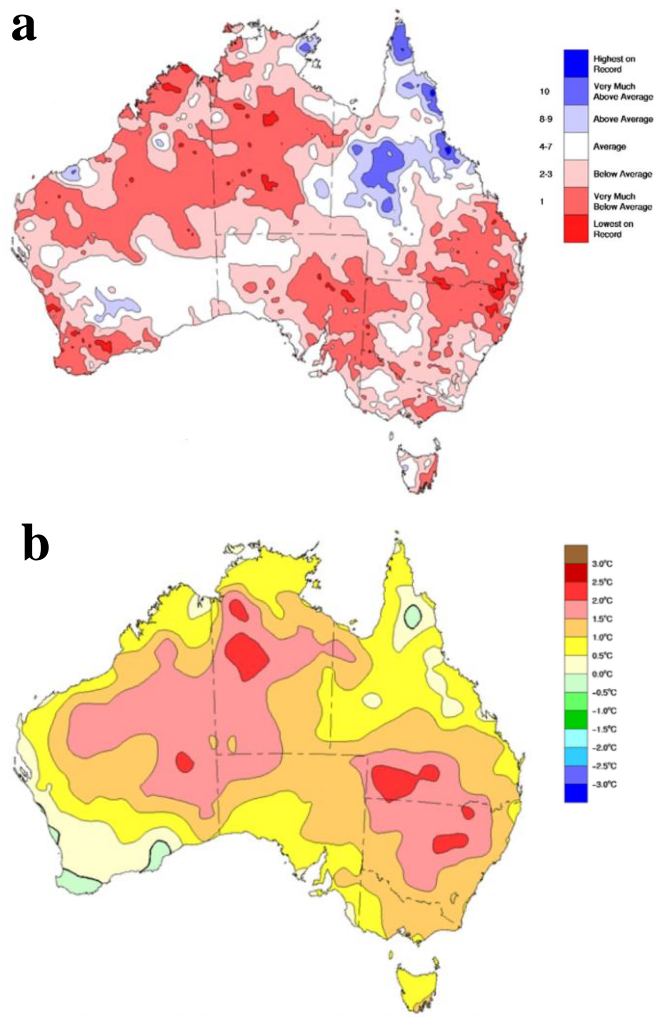

Supplementary Figure 1. Rainfall and temperature across Australia prior to the 2019-2020 fire season. (a) Rainfall deciles for the period 1 August 2018 – 31 July 2019, showing very low to record-low rainfall across much south-eastern Australia. (b) Mean temperature anomaly, 1 August 2018 – 31 July 2019. (a) and (b) were obtained from the Australian Government Bureau of Meteorology under Creative Commons Attribution 3.0 Australia (CC BY 3.0 AU) Licence.

**a** 31 July 2019

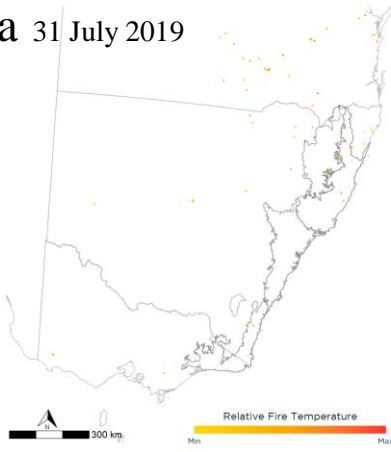

**b** 31 August 2019

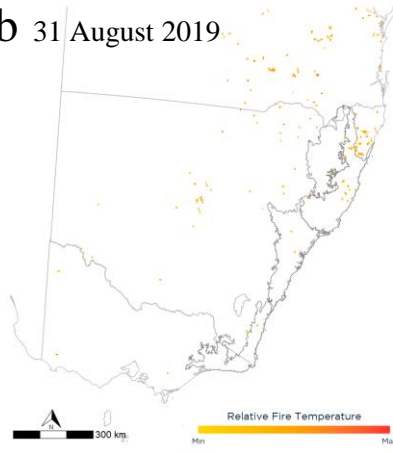

**c** 30 September 2019

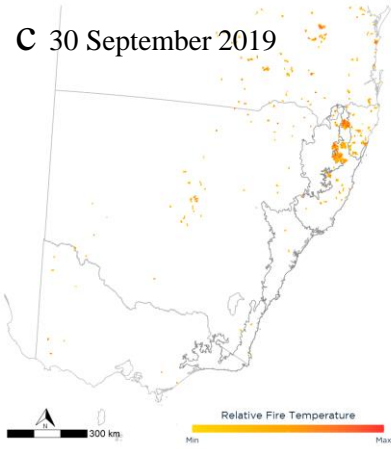

**d** 31 October 2019

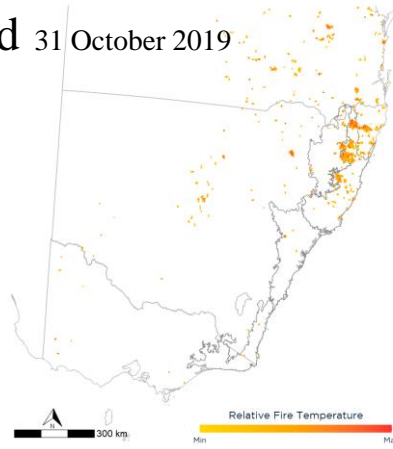

**e** 30 November 2019

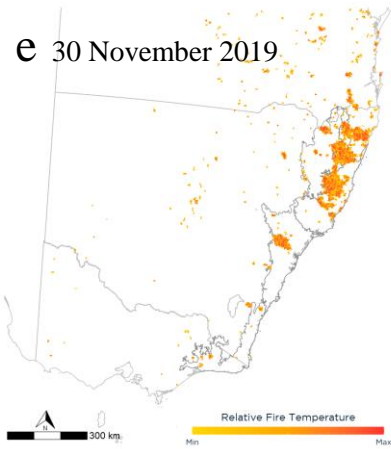

**f** 31 December 2019

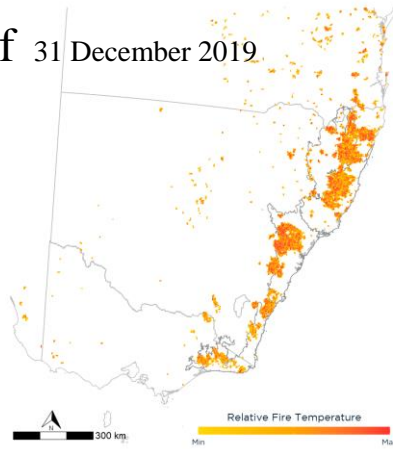

**g** 11 February 2020

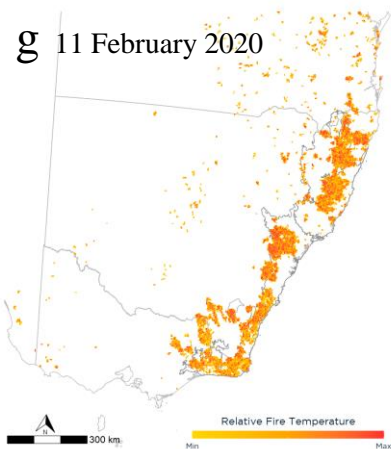

Supplementary Figure 2. Progression of the 2019-2020 fires between 1 July 2019 and 11 February 2020. (a-g) Cumulative extent of fires between 1 July 2019 and each date.

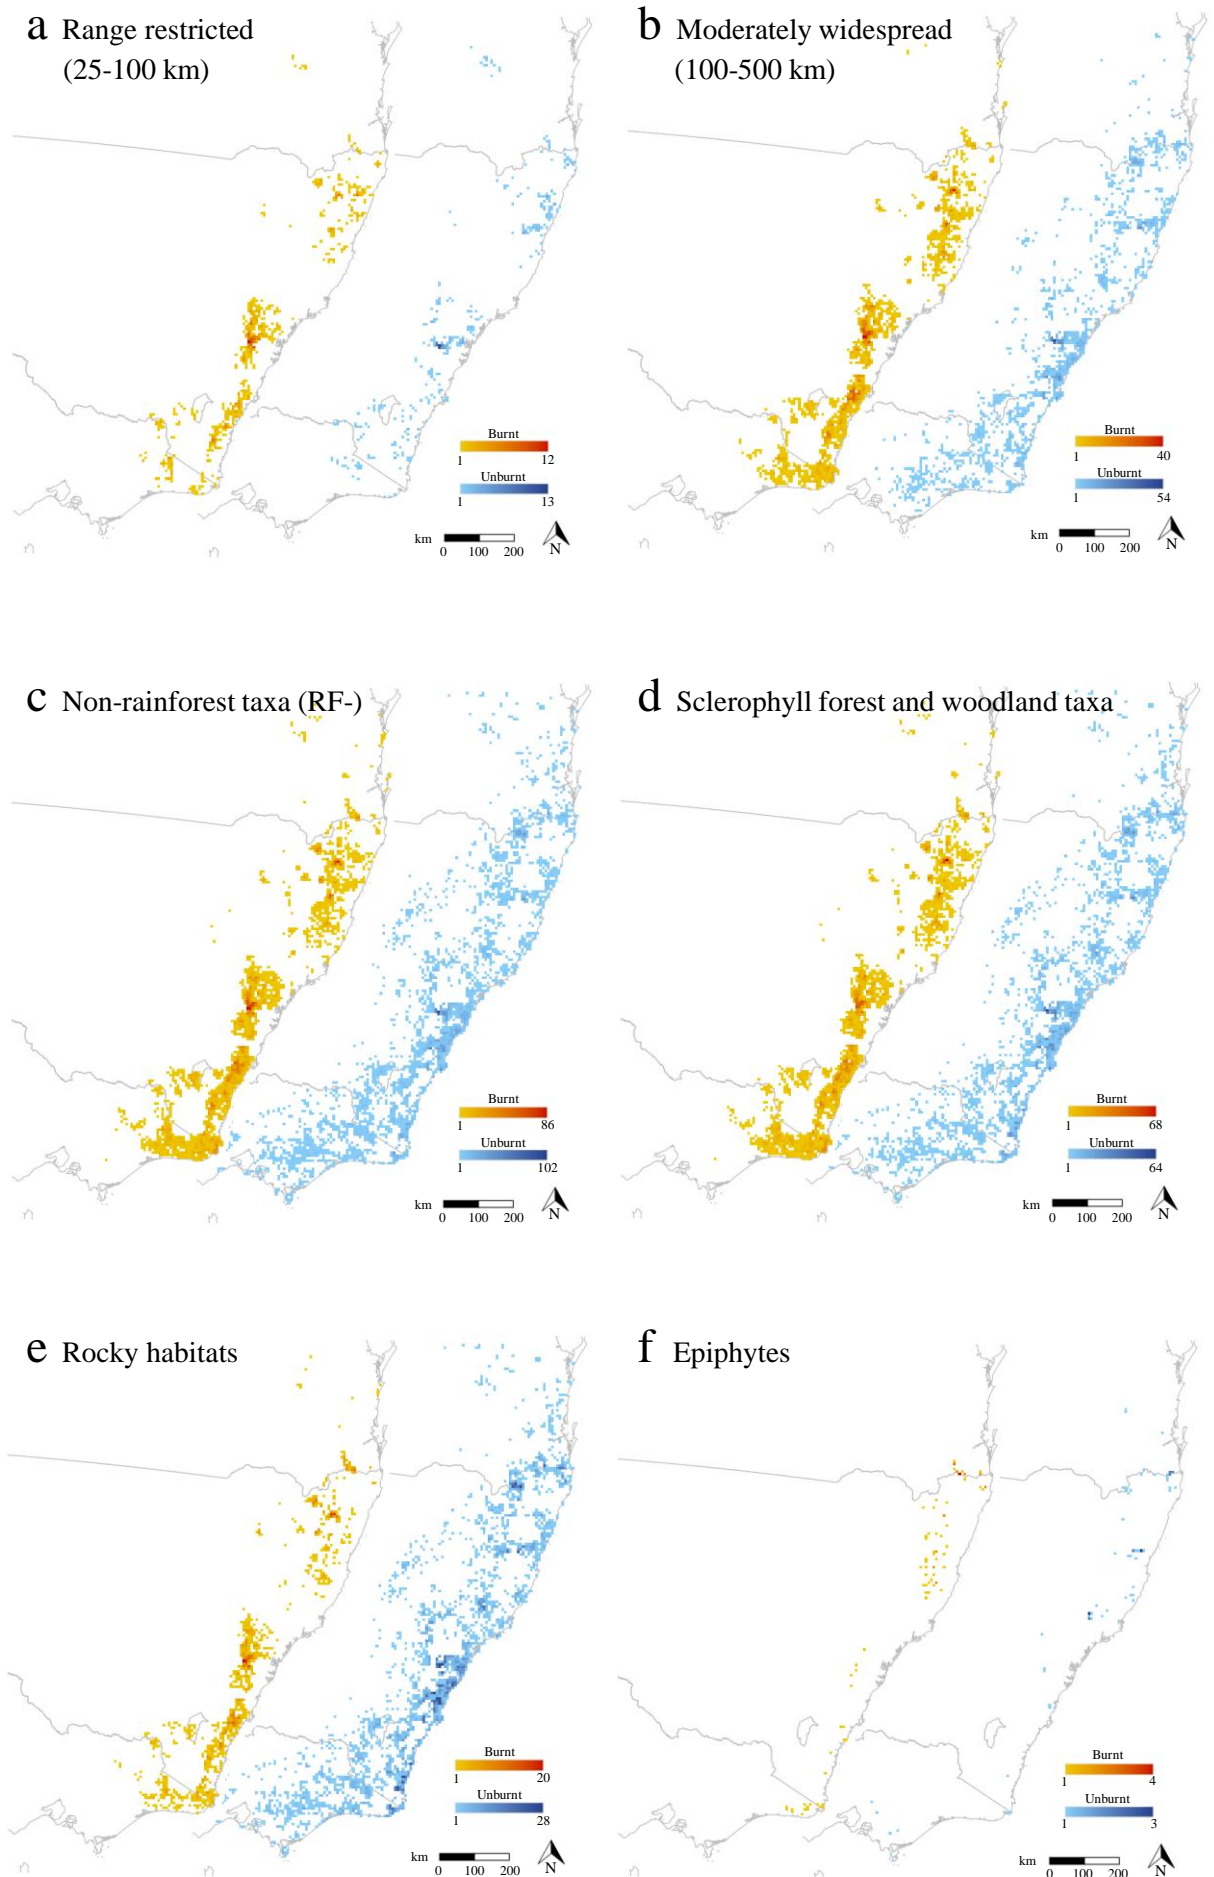

Supplementary Figure 3. Species richness based on burnt (red) and unburnt (blue) species location records aggregated to a 7.5 x 7.5 km grid. (a) Range restricted taxa with 25-100 km maximum range extent. (b) Moderately widespread taxa with 100-500 km maximum range extent. (c) Non-rainforest taxa. (d) Taxa found in sclerophyll forest and woodland. (e) Taxa often found in rocky habitats including exposed ridges, boulder fields, outcrops and cliffs. (f) Epiphytes.

Supplementary Table 1. Estimated area (ha) and percent of total (%) of broad vegetation types burnt during the 2019-2020 fires within 11 south-east Australian IBRA bioregions.

| Bioregion(s)                            |                | Broad vegetation types (NVIS 5.1 Major Vegetation Group Codes below) <sup>1</sup> |                                |                             |                           |                                                 |                                           |
|-----------------------------------------|----------------|-----------------------------------------------------------------------------------|--------------------------------|-----------------------------|---------------------------|-------------------------------------------------|-------------------------------------------|
|                                         |                | Rainforests and Vine Thickets                                                     | Eucalypt Forests and Woodlands | Other Forests and Woodlands | Shrublands and Heathlands | Grasslands, Herblands, Sedgeland, and Rushlands | Cleared, Non-Native Vegetation, Buildings |
| Name (CODE)                             | Fire metrics   | 1                                                                                 | 2, 3, 4, 5, 11                 | 6, 7, 8, 9, 10, 13, 15, 31  | 14, 16, 17, 18            | 19, 20, 21, 22                                  | 25                                        |
| All bioregions                          | Fire area (ha) | 328,901                                                                           | 7,337,880                      | 248,963                     | 217,740                   | 59,124                                          | 2,059,123                                 |
|                                         | % burned       | 33.0                                                                              | 28.2                           | 8.4                         | 28.8                      | 6.2                                             | 5.6                                       |
| Coastal Bioregions (NET, NNC, SYB, SEC) | Fire area (ha) | 244,645                                                                           | 4,397,004                      | 100,845                     | 174,589                   | 12,423                                          | 824,961                                   |
|                                         | % burned       | 58.6                                                                              | 58.8                           | 38.4                        | 63.0                      | 36.2                                            | 19.2                                      |
| Australian Alps (AUA)                   | Fire area (ha) | 34.0                                                                              | 426,732                        | 1,139                       | 3,490                     | 21,941                                          | 3,995                                     |
|                                         | % burned       | 0.8                                                                               | 39.0                           | 18.4                        | 14.7                      | 24.9                                            | 42.0                                      |
| Brigalow Belt South (BBS)               | Fire area (ha) | 8,805                                                                             | 552,872                        | 56,366                      | 8,210                     | 6,557                                           | 359,078                                   |
|                                         | % burned       | 5.6                                                                               | 6.8                            | 3.0                         | 3.4                       | 2.0                                             | 2.2                                       |
| Nandewar (NAN)                          | Fire area (ha) | 1,421                                                                             | 104,666                        | 33,623                      | 1,823                     | 1,073                                           | 49,059                                    |
|                                         | % burned       | 6.5                                                                               | 14.4                           | 9.2                         | 33.6                      | 0.8                                             | 4.8                                       |
| New England Tablelands (NET)            | Fire area (ha) | 13,058                                                                            | 467,003                        | 41,737                      | 11,949                    | 5,307                                           | 234,635                                   |
|                                         | % burned       | 79.2                                                                              | 42.2                           | 27.1                        | 56.2                      | 74.8                                            | 15.2                                      |
| NSW North Coast (NNC)                   | Fire area (ha) | 175,970                                                                           | 1,323,743                      | 7,426                       | 8,486                     | 4,579                                           | 353,296                                   |
|                                         | % burned       | 59.6                                                                              | 59.4                           | 31.7                        | 30.0                      | 32.5                                            | 27.0                                      |
| NSW South Western Slopes (NSS)          | Fire area (ha) | 0                                                                                 | 123,724                        | 429                         | 725                       | 393                                             | 140,946                                   |
|                                         | % burned       | 0                                                                                 | 11.6                           | 0.3                         | 1.1                       | 0.3                                             | 2.1                                       |
| South East Coastal Plain (SCP)          | Fire area (ha) | 0                                                                                 | 1,522                          | 0                           | 20                        | 0                                               | 5,039                                     |
|                                         | % burned       | 0                                                                                 | 0.5                            | 0                           | 0.03                      | 0                                               | 0.4                                       |
| South East Corner (SEC)                 | Fire area (ha) | 32,696                                                                            | 1,360,556                      | 46,563                      | 17,117                    | 1,074                                           | 120,484                                   |
|                                         | % burned       | 82.8                                                                              | 67.1                           | 72.3                        | 42.2                      | 24.2                                            | 36.0                                      |
| South Eastern Highlands (SEH)           | Fire area (ha) | 10,158                                                                            | 1,070,714                      | 8,592                       | 14,771                    | 5,594                                           | 261,803                                   |
|                                         | % burned       | 31.0                                                                              | 24.4                           | 36.82                       | 32.8                      | 3.4                                             | 7.8                                       |
| Southeast Queensland (SEQ)              | Fire area (ha) | 63,838                                                                            | 660,646                        | 47,969                      | 14,112                    | 11,143                                          | 414,242                                   |
|                                         | % burned       | 17.6                                                                              | 23.8                           | 20.8                        | 34.6                      | 19.5                                            | 10.0                                      |
| Sydney Basin (SYB)                      | Fire area (ha) | 22,921                                                                            | 1,245,702                      | 5,119                       | 137,037                   | 1,463                                           | 116,546                                   |
|                                         | % burned       | 34.6                                                                              | 58.8                           | 24.7                        | 73.2                      | 16.8                                            | 10.4                                      |

<sup>1</sup> Major Vegetation Groups by code are as follows: 1 = Rainforests and Vine Thickets, 2 = Eucalypt Tall Open Forests, 3 = Eucalypt Open Forests, 4 = Eucalypt Low Open Forests, 5 = Eucalypt Woodlands, 6 = Acacia Forests and Woodlands, 7 = Callitris Forests and Woodlands, 8 = Casuarina Forests and Woodlands, 9 = Melaleuca Forests and Woodlands, 10 = Other Forests and Woodlands, 11 = Eucalypt Open Woodlands, 13 = Acacia Open Woodlands, 14 = Mallee Woodlands and Shrublands, 15 = Low Closed Forests and Tall Closed Shrublands, 16 = Acacia Shrublands, 17 = Other Shrublands, 18 = Heathlands, 19 = Tussock Grasslands, 20 = Hummock Grasslands, 21 = Other Grasslands, Herblands, Sedgeland and Rushlands, 22 = Chenopod Shrublands, Samphire Shrublands and Forblands, 25 = Cleared, Non-Native Vegetation, Buildings, 31 = Other Open Woodlands.

Supplementary Table 2. Number of vascular plant taxa in different life forms by rainforest habitat category.

| Life form |                              | Rainforest Category |    |     |      | Total |
|-----------|------------------------------|---------------------|----|-----|------|-------|
| Code      | Name                         | RF-                 | RF | RF+ | RF++ |       |
| AF        | Annual forb                  | 12                  |    |     |      | 12    |
| AG        | Annual graminoid             | 2                   |    |     |      | 2     |
| AQ        | Aquatic                      | 3                   |    |     |      | 3     |
| CL        | Climber                      | 4                   | 2  | 4   | 2    | 12    |
| EP        | Epiphyte                     |                     |    | 2   | 6    | 8     |
| PF        | Non-geophytic perennial forb | 50                  | 5  | 4   | 1    | 60    |
| GF        | Geophytic perennial forb     | 57                  | 2  |     |      | 59    |
| PG        | Perennial graminoid          | 49                  | 2  | 2   | 3    | 56    |
| LS        | Low shrub and subshrub       | 160                 | 1  | 4   |      | 165   |
| MS        | Medium shrub                 | 239                 | 8  | 5   | 1    | 253   |
| TS        | Tall Shrub                   | 64                  | 11 | 3   | 4    | 82    |
| LT        | Low tree                     | 37                  | 4  | 4   | 7    | 52    |
| MT        | Medium tree                  | 25                  |    | 2   | 2    | 29    |
| TT        | Tall Tree                    | 8                   | 2  |     | 1    | 11    |
| SFC       | Short ferns and cycads       | 6                   | 3  |     | 1    | 10    |
| TFC       | Tall ferns and cycads        |                     | 1  | 1   |      | 2     |
| Total     |                              | 716                 | 41 | 31  | 28   | 816   |

<sup>1</sup>RF++ = Rainforest, primarily or solely occurring in rainforests; RF+ = Semi-rainforest, occurring in rainforests but not restricted to them and frequently found in adjacent habitats, especially wet sclerophyll forests; RF = Rainforest margin, sometimes found around the margins of rainforest but more prevalent in other habitats and not typically considered a rainforest species; RF- = Non-rainforest, not considered a rainforest species and rarely if ever found in them.

Supplementary Table 3. Counts of species endemic to the study area classified by life form and range size class.

| Life form |                              | Maximum range extent <sup>1</sup> |             |              |               |               |               |                |          | Total |
|-----------|------------------------------|-----------------------------------|-------------|--------------|---------------|---------------|---------------|----------------|----------|-------|
|           |                              | ERR                               | VRR         | RR           | MWIDE (A)     | MWIDE (B)     | VWIDE (A)     | VWIDE (B)      | EWIDE    |       |
|           |                              | 0 to 10 km                        | 10 to 25 km | 25 to 100 km | 100 to 250 km | 250 to 500 km | 500 to 750 km | 750 to 1000 km | >1000 km |       |
| Code      | Name                         |                                   |             |              |               |               |               |                |          |       |
| LS        | Low shrub and subshrub       | 6                                 | 8           | 36           | 49            | 35            | 6             | 5              | 3        | 148   |
| MS        | Medium shrub                 | 22                                | 20          | 52           | 61            | 40            | 17            | 12             | 12       | 236   |
| TS        | Tall Shrub                   | 5                                 | 6           | 14           | 12            | 24            | 7             | 3              | 3        | 74    |
| LT        | Low tree                     | 1                                 | 1           | 12           | 19            | 10            | 2             | 3              | 2        | 50    |
| MT        | Medium tree                  | 1                                 | 1           | 5            | 6             | 6             | 3             | 2              | 0        | 24    |
| TT        | Tall Tree                    | 1                                 | 0           | 1            | 2             | 3             | 2             | 1              | 0        | 10    |
| GF        | Geophytic perennial forb     | 5                                 | 5           | 12           | 17            | 8             | 2             | 1              | 1        | 51    |
| PF        | Non-geophytic perennial forb | 4                                 | 5           | 5            | 10            | 7             | 4             | 1              | 6        | 42    |
| CL        | Climber                      | 0                                 | 0           | 0            | 1             | 4             | 1             | 0              | 0        | 6     |
| EP        | Epiphyte                     | 0                                 | 0           | 0            | 0             | 2             | 3             | 0              | 0        | 5     |
| AF        | Annual forb                  | 2                                 | 0           | 2            | 1             | 1             | 1             | 2              | 1        | 10    |
| AG        | Annual graminoid             | 0                                 | 0           | 0            | 0             | 1             | 0             | 0              | 0        | 1     |
| AQ        | Aquatic                      | 0                                 | 0           | 0            | 0             | 0             | 0             | 0              | 1        | 1     |
| PG        | Perennial graminoid          | 3                                 | 0           | 3            | 7             | 8             | 2             | 3              | 9        | 35    |
| SFC       | Short ferns and cycads       | 0                                 | 1           | 1            | 3             | 0             | 1             | 0              | 0        | 6     |
| TFC       | Tall ferns and cycads        | 0                                 | 1           | 0            | 0             | 0             | 0             | 0              | 0        | 1     |
| Total     |                              | 50                                | 48          | 143          | 188           | 149           | 51            | 33             | 38       | 700   |

<sup>1</sup>ERR = extremely range-restricted, VRR = very range-restricted, RR = range-restricted, MWIDE (A) = moderately widespread, smaller; MWIDE (B) = moderately widespread, larger; VWIDE (A) = very widespread, smaller; VWIDE (B) = very widespread, smaller; EWIDE = extremely widespread.

## Supplementary Notes

Supplementary Notes 1: Further details of range extent ( $RE_T$ ) by habitat type (rainforest) category analysis.

This analysis was performed to compare the maximum range extent of species grouped by habitat type (i.e., rainforest, semi-rainforest, rainforest margin and non-rainforest). A boxplot containing these data is shown in Supplementary Notes Figure 1.

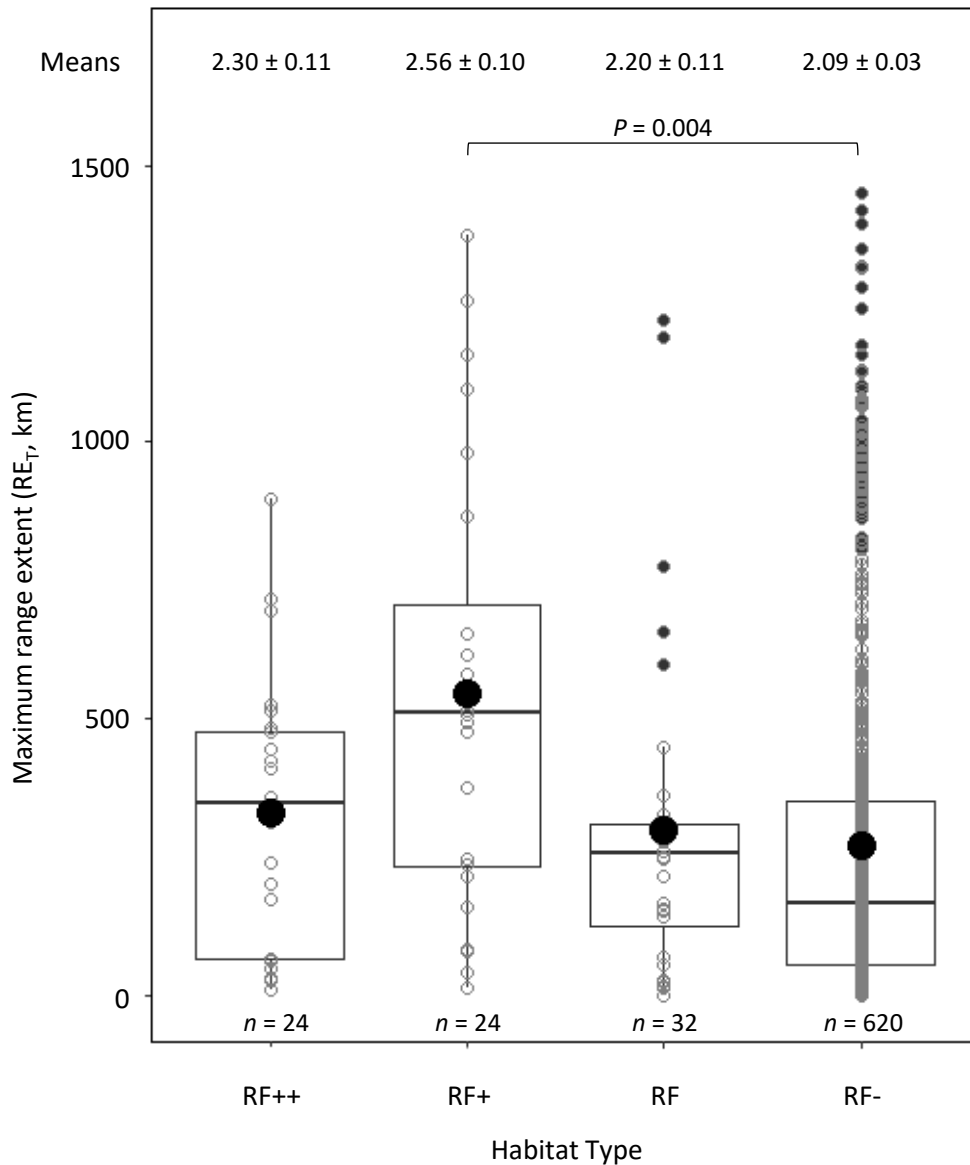

Supplementary Notes 1 Figure 1. Boxplot showing maximum range extent ( $RE_T$ ) of plant species endemic to the south-east mainland study area grouped by habitat type category (RF++ = rainforest, RF+ = semi-rainforest, RF = rainforest margins, RF- = non-rainforests). Maximum range extent was determined as the maximum distance between any two specimen location records. Log-transformed means ( $\pm 1$  SE) are shown at top, with significant (two-way tests at the 0.05 criterion) post-hoc means comparisons determined using Tukey's Honest Significant Difference method. Species numbers in each habitat type are provided below each group; data points are shown as small circles and group means (untransformed) are shown as large filled circles. The middle and lower and upper hinges of each boxplot correspond to the median and first and third quartiles respectively while whiskers extend to the largest value  $\leq 1.5$  times the interquartile range; data outliers are filled in black.



## Supplementary Notes

### Supplementary Notes 1: continued

One-way analysis of variance performed on log-transformed data indicate a significant difference among means:  $F = 4.65$ ;  $df = 3, 696$ ;  $P = 0.003$ . Post-hoc analysis indicates that semi-rainforest and non-rainforest species means were significantly different (two-way  $P = 0.004$ ); all other mean differences were not significant at the 0.05 criterion.

Additional non-parametric tests yield similar results. Differences among habitat types were significant based on the Kruskal-Wallis rank sum test ( $\chi^2 = 14.3$ ,  $df = 3$ ,  $P = 0.003$ ) and the RF+ vs. RF- comparison was significant based on two tailed pairwise Wilcoxon tests ( $P = 0.01$ ). No other group differences were significant.

## Supplementary Notes

Supplementary Notes 2: Further details of quantile regression of proportion burnt by range extent.

The relationship between maximum range extent ( $RE_T$ ) and proportion of range or populations burnt ( $PF_M$ ) was further investigated because it showed a strongly triangular relationship. The results of quantile regression show a steep relationship between maximum range extent ( $RE_T$ ) and proportion burnt ( $PF_M$ ) at the 0.90 quantile ( $PF_M = 1.006 - 0.00033RE_T$ ;  $P < 0.001$ ), with  $PF_M$  falling by roughly 0.15 (15% of range burnt) per 500 km increase in range (Supplementary Notes Figure 2). The number of species with very large proportions of their ranges burnt declines with range size, with very few species that have ranges over 750 km experiencing fire over 75% or more of their range.

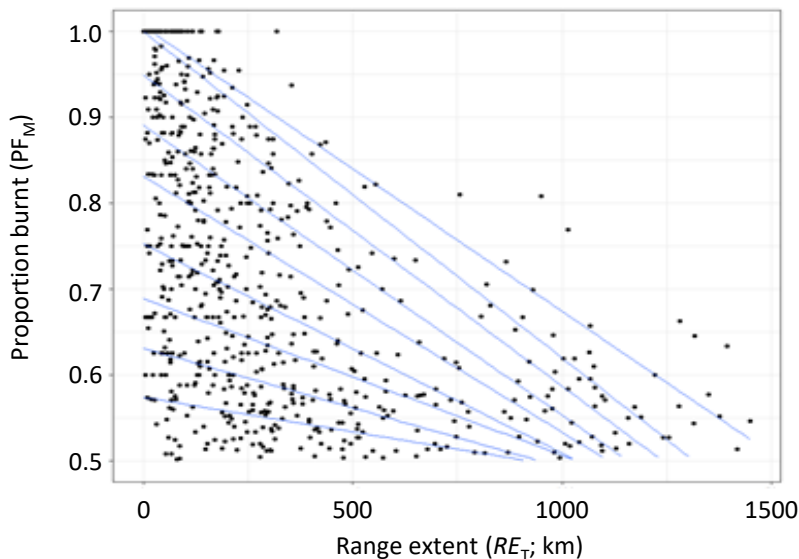

Supplementary Notes 2 Figure 2. Results of quantile regression, showing linear regression models for quantiles 0.10, 0.20....0.90.

The estimated slope coefficient is also significantly less steep than that of the least square estimate (red line; dashed = 90% confidence interval) at low quantiles (0.10-0.40) and steeper at higher quantiles (0.60 – 0.80).

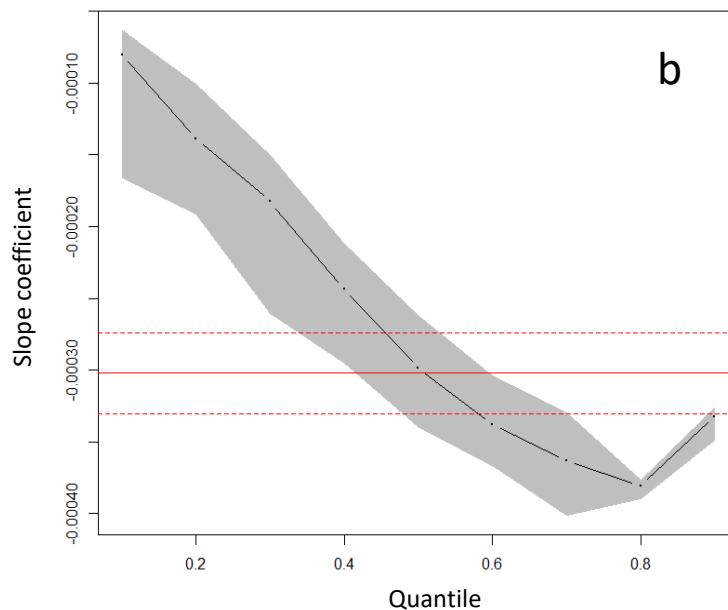

Supplementary Notes 2 Figure 2. Results of quantile regression, showing changes in slope coefficient across quantiles. The 90% confidence interval is shaded in gray.

## Supplementary Notes

### Supplementary Notes 3

#### Contingency analysis of life form by range extent

The aim of this analysis was to investigate whether any relationship existed between range extent ( $RE_T$ ) and life form across all species endemic to the study region. The primary analysis of this relationship was provided in Figure 3c and the accompanying legend text. We also conducted a contingency analysis of the same relationship but with grouped  $RE_T$  and life form categories. Both categories were grouped because many cell values in ungrouped data contained counts of less than 5 (Supplementary Table 3), particularly for life form classes containing few species.

The contingency table was as follows:

Table 1. Counts of species in six life form classes across four range extent classes.

E+VRR = extremely to very range restricted, maximum range extent ( $RE_T$ ) < 25km; RR = range restricted,  $RE_T$  = 25 to <100 km; MWIDE = moderately widespread,  $RE_T$  = 100 to <500 km), V+EWIDE = very to extremely widespread,  $RE_T$  > 500 km.

| Life form class | Range extent class |     |       |       | Total |
|-----------------|--------------------|-----|-------|-------|-------|
|                 | E+VRR              | RR  | MWIDE | V+EWI |       |
| Low shrubs      | 14                 | 36  | 84    | 14    | 148   |
| Medium shrubs   | 42                 | 52  | 101   | 41    | 236   |
| Tall shrubs     | 11                 | 14  | 36    | 13    | 74    |
| Trees           | 5                  | 18  | 46    | 15    | 84    |
| Perennial Forbs | 19                 | 17  | 42    | 15    | 93    |
| Other           | 7                  | 6   | 28    | 24    | 65    |
| Total           | 98                 | 143 | 337   | 122   | 700   |

Contingency analysis was performed using the R base package ‘stats’ version 4.0.1. The result indicated the presence of a highly significant row-column relationship (Pearson  $\chi^2 = 42.1$ ,  $df = 15$ ,  $P = 0.0002$ ). Pearson residuals are as follows:

Table 2. Pearson residuals

| Life form group | Range extent class |      |       |         |
|-----------------|--------------------|------|-------|---------|
|                 | E+VRR              | RR   | MWIDE | V+EWIDE |
| Low shrubs      | -1.5               | 1.0  | 1.5   | -2.3    |
| Medium shrubs   | 1.6                | 0.5  | -1.2  | 0.0     |
| Tall shrubs     | 0.2                | -0.3 | 0.1   | 0.0     |
| Trees           | -2.0               | 0.2  | 0.9   | 0.1     |
| Perennial Forbs | 1.7                | -0.5 | -0.4  | -0.3    |
| Other           | -0.7               | -2.0 | -0.6  | 3.8     |

## Supplementary Notes

Supplementary Notes 4  
List of R packages used

R version 4.0.1 (2020-06-06)  
Platform: x86\_64-w64-mingw32/x64 (64-bit)  
Running under: Windows Server x64 (build 14393)

Matrix products: default

Attached base packages:

grid, tools, stats, graphics, grDevices, utils, datasets, methods, base

Other attached packages:

quantreg\_5.75, SparseM\_1.78, Cairo\_1.5-12.2, ggspatial\_1.1.4, ggthemes\_4.2.0, extrafontdb\_1.0, extrafont\_0.17, gridExtra\_2.3, mapview\_2.9.0, dismo\_1.3-3, rJava\_0.9-13, forcats\_0.5.0, purrr\_0.3.4, readr\_1.4.0, tidyr\_1.1.2, tibble\_3.0.4, ggplot2\_3.3.2, tidyverse\_1.3.0, stringr\_1.4.0, dplyr\_1.0.2, smoothr\_0.1.2, stars\_0.4-3, abind\_1.4-5, sf\_0.9-6, rgeos\_0.5-5, raster\_3.4-5, rgdal\_1.5-18, sp\_1.4-4, moments\_0.14

MaxEnt version 3.4.1<sup>1</sup> (available at [https://biodiversityinformatics.amnh.org/open\\_source/maxent/](https://biodiversityinformatics.amnh.org/open_source/maxent/)) was used for species distribution modelling.

<sup>1</sup>Steven J. Phillips, Miroslav Dudík, Robert E. Schapire. [Internet] Maxent software for modeling species niches and distributions (Version 3.4.1). Available from url: [http://biodiversityinformatics.amnh.org/open\\_source/maxent/](http://biodiversityinformatics.amnh.org/open_source/maxent/). Accessed on 2020-09-19.
