# Supplementary material for: Implications of the 2019–2020 megafires for the biogeography and conservation of Australian vegetation
Source: PubMed Central journal article supplement (PMC7884386; doi:10.1038/s41467-021-21266-5), 2021-02-15
Supplement: 41467_2021_21266_MOESM3_ESM.pdf [file 41467_2021_21266_MOESM3_ESM.pdf]

## Description of Additional Supplementary Files

**File Name:** Supplementary Data 1

**Description:** Some major bush fires events across south-eastern Australia, 1850-2016.

**File Name:** Supplementary Data 2

**Description:** List of species with more than 50% of geocoded location records or predicted ranges occurring within the south-east Australian mainland fires, including model, range, life form, trait and habitat data.

**File Name:** Supplementary Data 3

**Description:** Fire trait data for 270 taxa with more than 50% of geocoded location records or predicted ranges occurring within the south- east Australian mainland fires.
